# Supplementary material
Source: publisher site journal article supplement (https://www.degruyterbrill.com/publication/isbn/9783110306323/downloadAsset/9783110306323_Inhaltsverzeichnis.pdf)
Supplement: Supplementary file 1 [file 9783110306323_Inhaltsverzeichnis.pdf]

# Inhalt

- 1      Einleitung — 1**
- 2      Die deutsche Gegenwartssprache im Kontext aktueller gesellschaftlicher Entwicklungen — 6**
- 3      Kommunikation, Diskurs, Dialog, Interaktion: Eine Begriffsbestimmung — 21**
  - 3.1      Kommunikation — 22
  - 3.2      Diskurs und Dialog — 28
    - 3.2.1      Die Diskursanalyse/Funktionale Pragmatik nach Ehlich/Rehbein/Redder — 31
    - 3.2.2      Die Dialoganalyse nach Hundsniischer/Weigand — 35
    - 3.2.3      Die Dialogic Syntax nach Du Bois und der Dialogism nach Linell — 40
  - 3.3      Interaktion — 46
    - 3.3.1      Interaktion nach Kieserling — 47
    - 3.3.2      Interaktion in der Konversationsanalyse / Interaktionalen Linguistik — 51
- 4      Sprache-in-Interaktion — 59**
  - 4.1      Grundannahmen der Forschung zu Sprache-in-Interaktion — 60
    - 4.1.1      Das übergeordnete Prinzip: Reflexivität — 61
    - 4.1.2      Das erste fundamentale dialogische Prinzip: Sequenzialität — 64
    - 4.1.3      Das zweite fundamentale dialogische Prinzip: Gemeinsames Hervorbringen von Bedeutung und Struktur („joint construction“) — 67
    - 4.1.4      Das dritte fundamentale dialogische Prinzip: Sprache ist in Kontext eingebettet — 69
  - 4.2      Theoretische Ansätze: Gesprächsanalyse, Interaktionale Linguistik und die Analyse kommunikativer Gattungen — 71
    - 4.2.1      Gesprächsanalyse — 71
    - 4.2.2      Interaktionale Linguistik — 77
    - 4.2.3      Die Analyse kommunikativer Gattungen — 84
  - 4.3      Kann man Kommunikation lehren? — 88
  - 4.4      Getippte Gespräche? Sprache-in-Interaktion in den Neuen Medien — 94
  - 4.5      Sprache-in-Interaktion und normierte Sprache — 100

|          |                                                                                                                                                                             |
|----------|-----------------------------------------------------------------------------------------------------------------------------------------------------------------------------|
| 4.6      | Sprache-in-Interaktion und Deutsch als Fremdsprache — 107                                                                                                                   |
| 4.6.1    | Rahmenbedingungen: Die Anforderungen an DaF im Gemeinsamen Europäischen Referenzrahmen für Sprachen — 108                                                                   |
| 4.6.2    | Interaktionskompetenzen: Lehrbuchinteraktionen und Arbeiten zur Vermittlung von Strukturen gesprochener Sprache und computervermittelter Kommunikation im DaF-Kontext — 115 |
| 4.6.3    | Wie viel Wissen über Sprache-in-Interaktion vertragen DaF-Lehrende? — 122                                                                                                   |
| 4.6.4    | Wie viel Wissen über Sprache-in-Interaktion vertragen DaF-Lernende? — 132                                                                                                   |
| <b>5</b> | <b>Die Arbeit mit Gesprächsdaten — 140</b>                                                                                                                                  |
| 5.1      | Was sind und wozu brauchen wir authentische Gesprächsdaten? — 142                                                                                                           |
| 5.2      | Datenkorpora des gesprochenen Deutsch — 145                                                                                                                                 |
| 5.3      | Das Transkriptionssystem — 151                                                                                                                                              |
| <b>6</b> | <b>Von der Theorie zur Empirie: Sprache-in-Interaktion — 156</b>                                                                                                            |
| 6.1      | Sprache-in-Interaktion und Partikelgebrauch — 158                                                                                                                           |
| 6.1.1    | <i>ja</i> als Modalpartikel — 159                                                                                                                                           |
| 6.1.2    | <i>ja</i> als Responsiv — 161                                                                                                                                               |
| 6.1.3    | <i>ja</i> als Hörersignal — 174                                                                                                                                             |
| 6.1.4    | <i>ja</i> als Zögerungs- und Planungssignal bzw. als Diskursmarker — 176                                                                                                    |
| 6.1.5    | <i>ja</i> als Beendigungssignal — 184                                                                                                                                       |
| 6.1.6    | <i>ja</i> als Vergewisserungssignal — 191                                                                                                                                   |
| 6.1.7    | <i>ja</i> als Teil von Erkenntnisprozessmarkern — 193                                                                                                                       |
| 6.1.8    | Zusammenfassung der Ergebnisse — 195                                                                                                                                        |
| 6.2      | Sprache-in-Interaktion und Einheitenbildung — 200                                                                                                                           |
| 6.2.1    | Äußerungserweiterungen — 202                                                                                                                                                |
| 6.2.2    | Projektionen — 213                                                                                                                                                          |
| 6.2.3    | Fragmente und Zäsurierungen — 220                                                                                                                                           |
| 6.2.4    | Zusammenfassung der Ergebnisse — 232                                                                                                                                        |
| 6.3      | Sprache-in-Interaktion und Sequenzmuster/Gattungen — 237                                                                                                                    |
| 6.3.1    | Vorschläge annehmen und ablehnen — 237                                                                                                                                      |
| 6.3.2    | Gesprächseinstieg und Gesprächsausstieg — 248                                                                                                                               |
| 6.3.3    | Zusammenfassung der Ergebnisse — 268                                                                                                                                        |

|          |                                                                                      |
|----------|--------------------------------------------------------------------------------------|
| <b>7</b> | <b>Ausblick: Sprache-in-Interaktion in unterschiedlichen Anwendungsfeldern — 269</b> |
| 7.1      | Sprache-in-Interaktion in computervermittelter Kommunikation — 269                   |
| 7.1.1    | Partikelgebrauch in der computervermittelten Kommunikation — 271                     |
| 7.1.2    | Einheitenbildung in computervermittelter Kommunikation — 277                         |
| 7.1.3    | Sequenzmuster/Gattungen in computervermittelter Kommunikation — 281                  |
| 7.2      | Sprache-in-Interaktion in Referenzgrammatiken — 285                                  |
| 7.2.1    | Partikelgebrauch in Referenzgrammatiken — 286                                        |
| 7.2.2    | Einheitenbildung in Referenzgrammatiken — 288                                        |
| 7.2.3    | Sequenzmuster/Gattungen in Referenzgrammatiken — 291                                 |
| 7.3      | Sprache-in-Interaktion und Deutsch-als-Fremdsprache — 292                            |
| 7.3.1    | Partikelgebrauch im DaF-Unterricht — 292                                             |
| 7.3.2    | Einheitenbildung im DaF-Unterricht — 296                                             |
| 7.3.3    | Sequenzmuster/Gattungen im DaF-Unterricht — 298                                      |
| <b>8</b> | <b>Fazit — 305</b>                                                                   |
|          | <b>Literatur — 308</b>                                                               |
|          | <b>Anhang: Das vollständige Transkript eines privaten Telefongesprächs — 335</b>     |
|          | <b>Sachregister — 352</b>                                                            |
|          | <b>Personenregister — 354</b>                                                        |
